# Supplementary material for: Ordered RTiO2@ATiO2 architecture for dye-sensitized solar cell applications
Source: Royal Society of Chemistry journal article supplement (doi:10.1039/c6ra21420g), 2016-01-01
Supplement: c6ra21420g1.pdf [file c6ra21420g1.pdf]

## Supporting information

### Ordered $R_{TiO_2}@A_{TiO_2}$ Architectures for Dye-Sensitized Solar Cells Applications

Yuliang Liu<sup>b</sup>, Dandan Wang<sup>a</sup>, Jing Ni<sup>a</sup>, Shaofeng Zhang<sup>a</sup>, Xiujuan Jin<sup>a</sup>, Shijie Lv<sup>a</sup>,  
Zhaowu Wang<sup>ac</sup> and Jianfei Lei<sup>\*a</sup>

<sup>a</sup> School of Physics and Engineering, Henan University of Science and Technology, Luoyang 471023, China

<sup>b</sup> School of Materials and Engineering, Henan University of Science and Technology, Luoyang 471023, China

<sup>c</sup> National Laboratory of Solid State Microstructures, Nanjing University, Nanjing 210093, China.

#### Table of contents:

##### 1. Effects of the substrate on the $R_{TiO_2}$ films

**Figure S1** FE-SEM images of the  $R_{TiO_2}$  rods growing on the FTO substrate covered (a, b) and uncovered (c, d) with  $TiO_2$  compact layer, and the reaction time is 3 hours.

##### 2. Length growth investigation

**Figure S2** cross-view images of the  $R_{TiO_2}$  rods: length growth (a) 1 time, (b) 2 times and (c) 3 times. Scale bar: 1  $\mu m$

##### 3. Evaluation of the efficiency deviation

**Figure S3**  $J-V$  curves of the arrayed  $R_{TiO_2}$  DSSC (a) and the arrayed  $R_{TiO_2}@A_{TiO_2}$  DSSC (b) fabricated in the same conditions at different times.

**Table S1** Photovoltaic performance data and average deviation for the DSSCs based on arrayed  $R_{TiO_2}$  and arrayed  $R_{TiO_2}@A_{TiO_2}$ .

---

\* Corresponding author: School of Physics and Engineering, Henan University of Science and Technology, Luoyang 471023, China.

E-mail address: leijianfei9966@163.com (J. F. Lei).

## 1. Effects of the substrate on the $R_{TiO_2}$ films

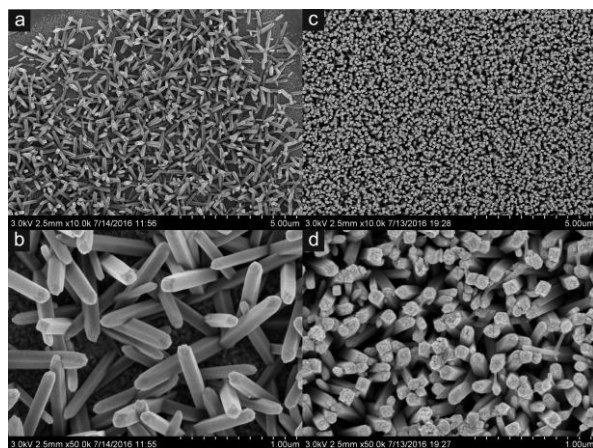

**Figure S1** FE-SEM images of the  $R_{TiO_2}$  rods growing on the FTO substrate covered (a, b) and uncovered (c, d) with  $TiO_2$  compact layer, and the reaction time is 3 hours.

## 2. Length growth investigation

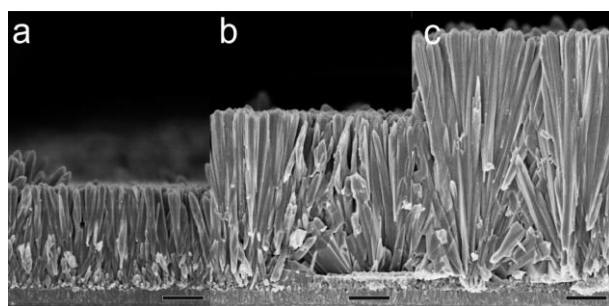

**Figure S2** cross-view images of the  $R_{TiO_2}$  rods: length growth (a) 1 time, (b) 2 times and (c) 3 times. Scale bar: 1  $\mu m$

## 3. Evaluation of the efficiency deviation

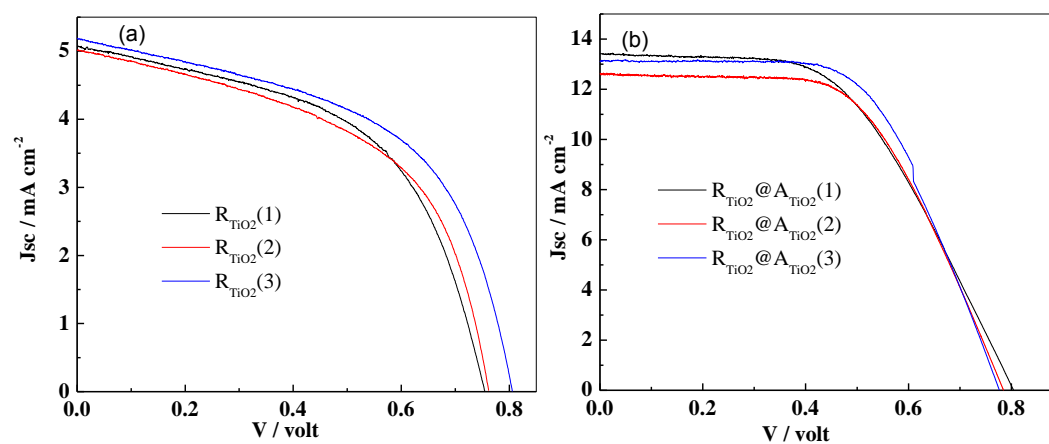

**Figure S3**  $J$ - $V$  curves of the arrayed  $R_{TiO_2}$  DSSC (a) and the arrayed  $R_{TiO_2}@A_{TiO_2}$  DSSC (b) fabricated in the same conditions at different times.

**Table S1** Photovoltaic performance data and average deviation for the DSSCs based on arrayed  $R_{TiO_2}$  and arrayed  $R_{TiO_2}@A_{TiO_2}$ .

| <b>cell</b>                              | <b><math>J_{sc}</math> (mA/cm<sup>2</sup>)</b> | <b>Voc (V)</b> | <b><math>\eta</math> (%)</b> | <b>average deviation</b> |
|------------------------------------------|------------------------------------------------|----------------|------------------------------|--------------------------|
| R <sub>TiO2</sub> (1)                    | 5.01                                           | 0.75           | 2.02                         |                          |
| R <sub>TiO2</sub> (2)                    | 5.02                                           | 0.76           | 1.99                         | 0.09                     |
| R <sub>TiO2</sub> (3)                    | 5.18                                           | 0.80           | 2.22                         |                          |
| R <sub>TiO2</sub> @A <sub>TiO2</sub> (1) | 13.41                                          | 0.80           | 5.68                         |                          |
| R <sub>TiO2</sub> @A <sub>TiO2</sub> (2) | 12.63                                          | 0.78           | 5.69                         | 0.21                     |
| R <sub>TiO2</sub> @A <sub>TiO2</sub> (3) | 13.12                                          | 0.77           | 6.15                         |                          |
